# Supplementary material for: Challenges and Opportunities with Providing Genetic Testing and Counseling for Mucopolysaccharidosis Type II in Kenya
Source: Research Square preprint supplement (doi:10.21203/rs.3.rs-5852058/v1), 2025-01-29
Supplement: Supplementary file 1 [file 1821b53862cb678334b889ec.xlsx]

## Sheet: Sheet1
Table 1. Baseline clinical characteristics of 17 male individuals from 13 families with MPS II.
	Attenuated MPS II (%)	Severe MPS II (%)
Total patients	6	11
Mean age in years at time of diagnosis	8.8	8.8
Variant type: deletion	1 (17)	6 (55)
Variant type: single nucleotide variant	5 (93)	5 (45)
Characteristic
Attends school	6 (100)	0 (0)
Snoring	6 (100)	11 (100)
Dysostosis multiplex	6 (100)	11 (100)
Communicates Verbally	6 (100)	0 (0)
Macrocephaly	6 (100)	11 (100)
Female carrier in family	5 (39)	13 (72)
Other reported deaths from similar illnesses across the 13 families	4 (14)	25 (86)
