# Supplementary material for: Challenges and Opportunities with Providing Genetic Testing and Counseling for Mucopolysaccharidosis Type II in Kenya
Source: Research Square preprint supplement (doi:10.21203/rs.3.rs-5852058/v1), 2025-01-29
Supplement: Supplementary file 2 [file 8c52ec493c948075456c0b64.xlsx]

## Sheet: Sheet1
Table 2. Correlation between phenotype and genotype of individuals with MPS II.
Family	Confirmed cases of MPS II per family	Female carriers identified	Reported deceased male relatives	Variant identified by clinical testing	Variant classification*	Phenotype of proband
A	3 (siblings)	3 (grandmother, mother, sister)	1 (uncle)	c.1327C>T, p.Arg443*	P	Attenuated
B	1	1 (mother)	2 (uncles)	c.1010G>A, p.Trp337*	P	Severe
C	1	3 (mother, 2 sisters)	0	c.670G>A, p.Gly224Arg	P	Severe
D	1	2 (grandmother, mother)	4 (2 brothers, 2 nephews)	c.486_489del, p.Glu163Serfs*49	LP	Severe
E	1	1 (mother)	0	c.418+1_418+26delinsC	P	Severe
F	2 (cousins)	6 (mother, 2 aunts, 2 cousins, grandmother)	12 (2 brothers, 4 cousins, 2 uncles, 4 distant uncles)	c.1403G>A, p.Arg468Gln	P	Severe
G	1	2 (mother, sister)	0	c.1122C>T, p.Gly374=	P	Attenuated
H	1	None tested	0	c.998C>T, p.Ser333Leu	LP	Severe
I	2 (cousins)	None tested	0	c.632del, p.Lys211Argfs*2	P	Severe
J	1	None tested	1 (brother)	c.253G>A, p.Ala85Thr	P	Attenuated
K	1	None tested	2 (uncles)	c.684del, p.His229Thrfs*51	P	Attenuated
L	1	None tested	0	c.418-2A>G	P	Severe
M	1	None tested	0	c.1010G>A, p.Trp337*	LP	Severe
*P: pathogenic; LP: likely pathogenic.
