# Supplementary material for: Challenges and Opportunities with Providing Genetic Testing and Counseling for Mucopolysaccharidosis Type II in Kenya
Source: Research Square preprint supplement (doi:10.21203/rs.3.rs-5852058/v1), 2025-01-29
Supplement: Supplementary file 3 [file e0491d6ba7635a38bd46508f.xlsx]

## Sheet: Sheet1
Table 3. Variants identified by expanded testing in individuals with MPS II. Familial testing of the two APOB variants identified in Family F confirmed both variants were on the same haplotype.
Family	Gene (OMIM #)	Variant identified	Zygosity	Phenotype
B, E, G, L	G6PD (305900)	c.466A>G; p.(Asn156Asp)	Hemizygous	Anemia, congenital, nonspherocytic hemolytic, 1, G6PD deficient
D	G6PD (305900)	c.466A>G; p.(Asn156Asp)	Hemizygous	Anemia, congenital, nonspherocytic hemolytic, 1, G6PD deficient
	UGT1A1 (191740)	c.1073del; p.(Asn358Thrfs*8)	Heterozygous	Crigler-Najjar syndrome types I and II; Hyperbilirubinemia, familial transient neonatal
	ABCA1	c.6083C>T p.(Ala2028Val)	Heterozygous	Tangier disease or familial HDL deficiency
	AGL	c.1885G>A p.(Glu629Lys)	Heterozygous	Glycogen storage disease type III
	ATP7B	c.1291T>C p.(Cys431Arg)	Heterozygous	Wilson Disease
	HGD	c.919C>T p.(Arg307Cys)	Heterozygous	Alkaptonuria
	PEX1 (602136)	c.319G>A p.(Glu107Lys)	Heterozygous	Heimler syndrome 1; Peroxisome biogenesis disorder 1A and 1B
	PKLR (609712)	c.7+1G>T	Heterozygous	Anemia, congenital, nonspherocytic hemolytic, 2, pyruvate kinase deficient
F	APOB (107730)	c.4210G>A p.(Val1404Met)	Heterozygous	Familial hypercholesterolemia; Hypobetalipoproteinemia
	APOB (107730)	c.13654A>G p.(Met4552Val)	Heterozygous	Familial hypercholesterolemia; Hypobetalipoproteinemia
K	BTD (609019)	c.1495C>T; p.(Pro499Ser)	Heterozygous	Biotinidase deficiency
